# Supplementary material
Source: MDPI journal article supplement (https://www.mdpi.com/2227-9717/10/8/1627)
Supplement: s1 [file s1]

## **Supplementary Information**

### **Efficient remediation of cadmium contamination in soil by functionalized biochar: Recent advances, challenges, and future prospects**

Yichang Lu<sup>1,2</sup>, Jiaqi Cheng<sup>1,2</sup>, Jieni Wang<sup>2,1</sup>, Fangfang Zhang<sup>2,1</sup>, Yijun Tian<sup>2,1</sup>, Chenxiao Liu<sup>2,1</sup>,  
Leichang Cao<sup>1,2\*</sup>, Yanmei Zhou<sup>2</sup>

<sup>1</sup> Miami College, Henan University, Kaifeng 475004, China

<sup>2</sup> Henan Joint International Research Laboratory of Environmental Pollution Control Materials,  
School of Chemistry and Chemical Engineering, Henan University, Kaifeng 475004, China

\*Corresponding Author: clch666@henu.edu.cn

**Number of Tables: 1**

**Table S1.** Common speciation analytic methods of heavy metals in soil.

| <b>Analytic method</b> | <b>Morphological division</b>                                                                                                                                                                                                    |
|------------------------|----------------------------------------------------------------------------------------------------------------------------------------------------------------------------------------------------------------------------------|
| Tessier                | exchangeable state, carbonate bound state, Fe–Mn oxide bound state, organic matter bound state, residue state                                                                                                                    |
| BCR                    | acid-soluble state (such as carbonate bound state), reducible state (such as Fe–Mn oxide state), oxidizable state (such as organic state) and residual state                                                                     |
| Forstner               | exchangeable state, carbonate bound state, amorphous manganese oxide bound state, organic state, amorphous iron oxide bound state, crystalline iron oxide bound state, residue state                                             |
| Shuman                 | exchangeable state, water-soluble state, carbonate bound state, weakly bound organic state, manganese oxide bound state, strongly bound organic state, amorphous iron oxide bound state and silicate mineral state               |
| Cambrell               | water soluble state, exchangeable state, inorganic compound precipitation state, macromolecular humus binding state, hydroxide precipitation absorption state or adsorption state, sulfide precipitation state and residue state |
| Leleyter               | water soluble, exchangeable, carbonate bound, amorphous manganese oxide bound, amorphous iron oxide bound, crystalline iron oxide bound, organic and residual                                                                    |
